# Supplementary figures and images for: Sex-Differences in Renal Expression of Selected Transporters and Transcription Factors in Lean and Obese Zucker Spontaneously Hypertensive Fatty Rats
Source: Hindawi journal article supplement (doi:10.1155/2015/483238), 2015-01-01

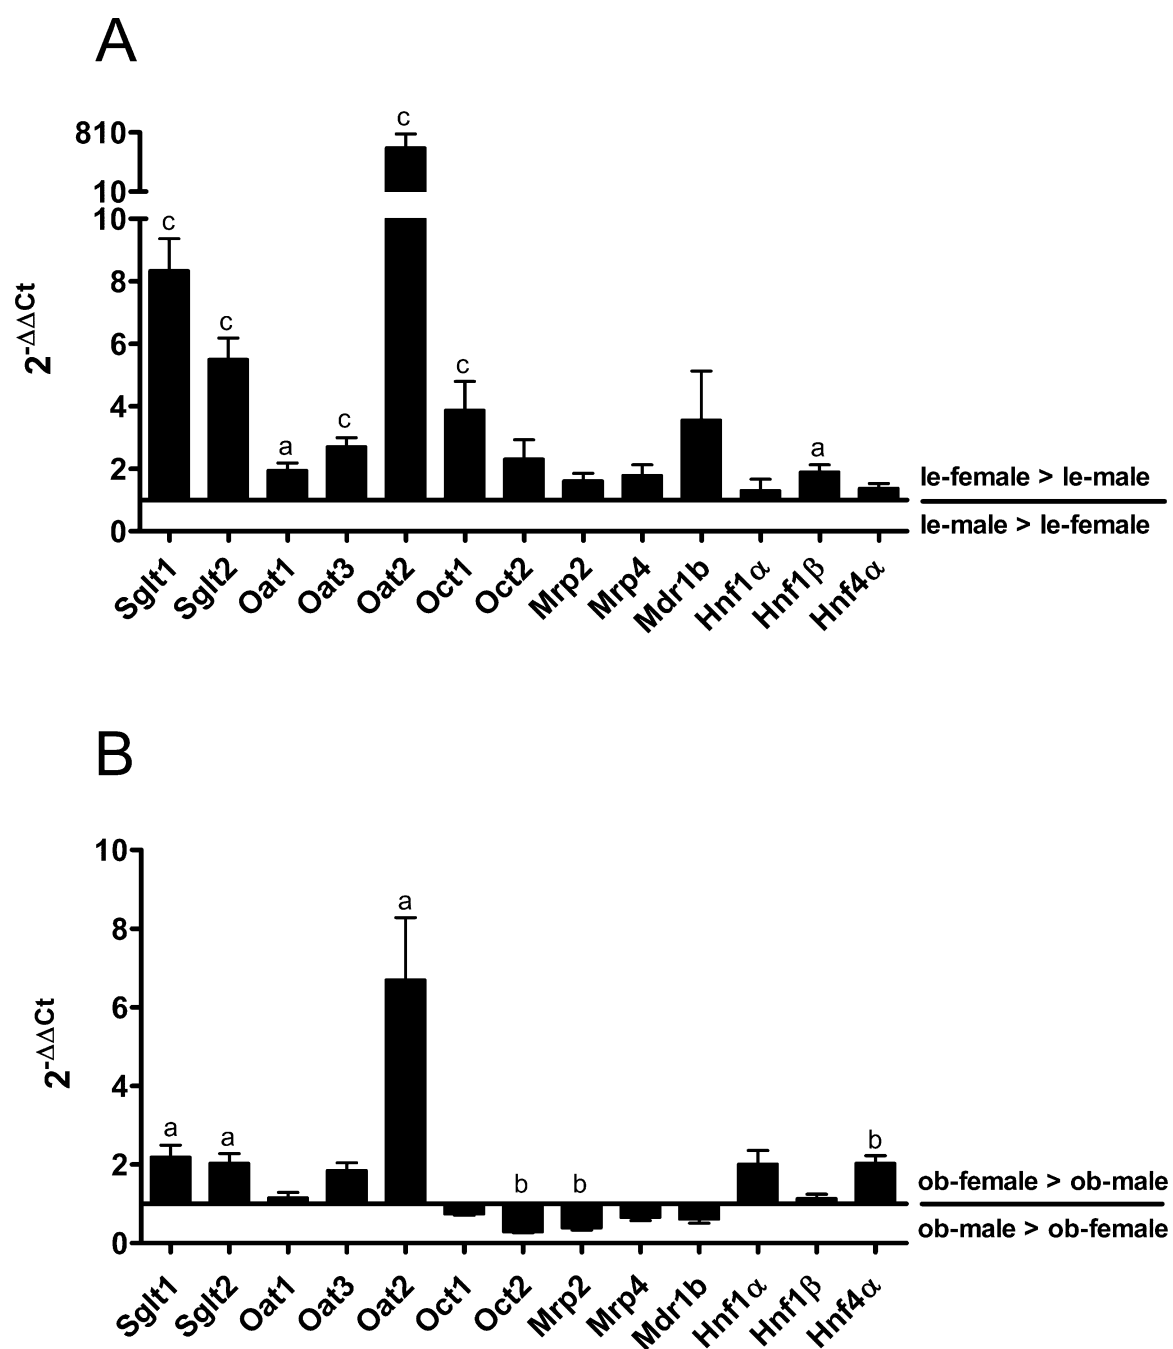

Supplementary figure 1

1

2

3

4

Supplement: f1 [file 483238.f1.zip]

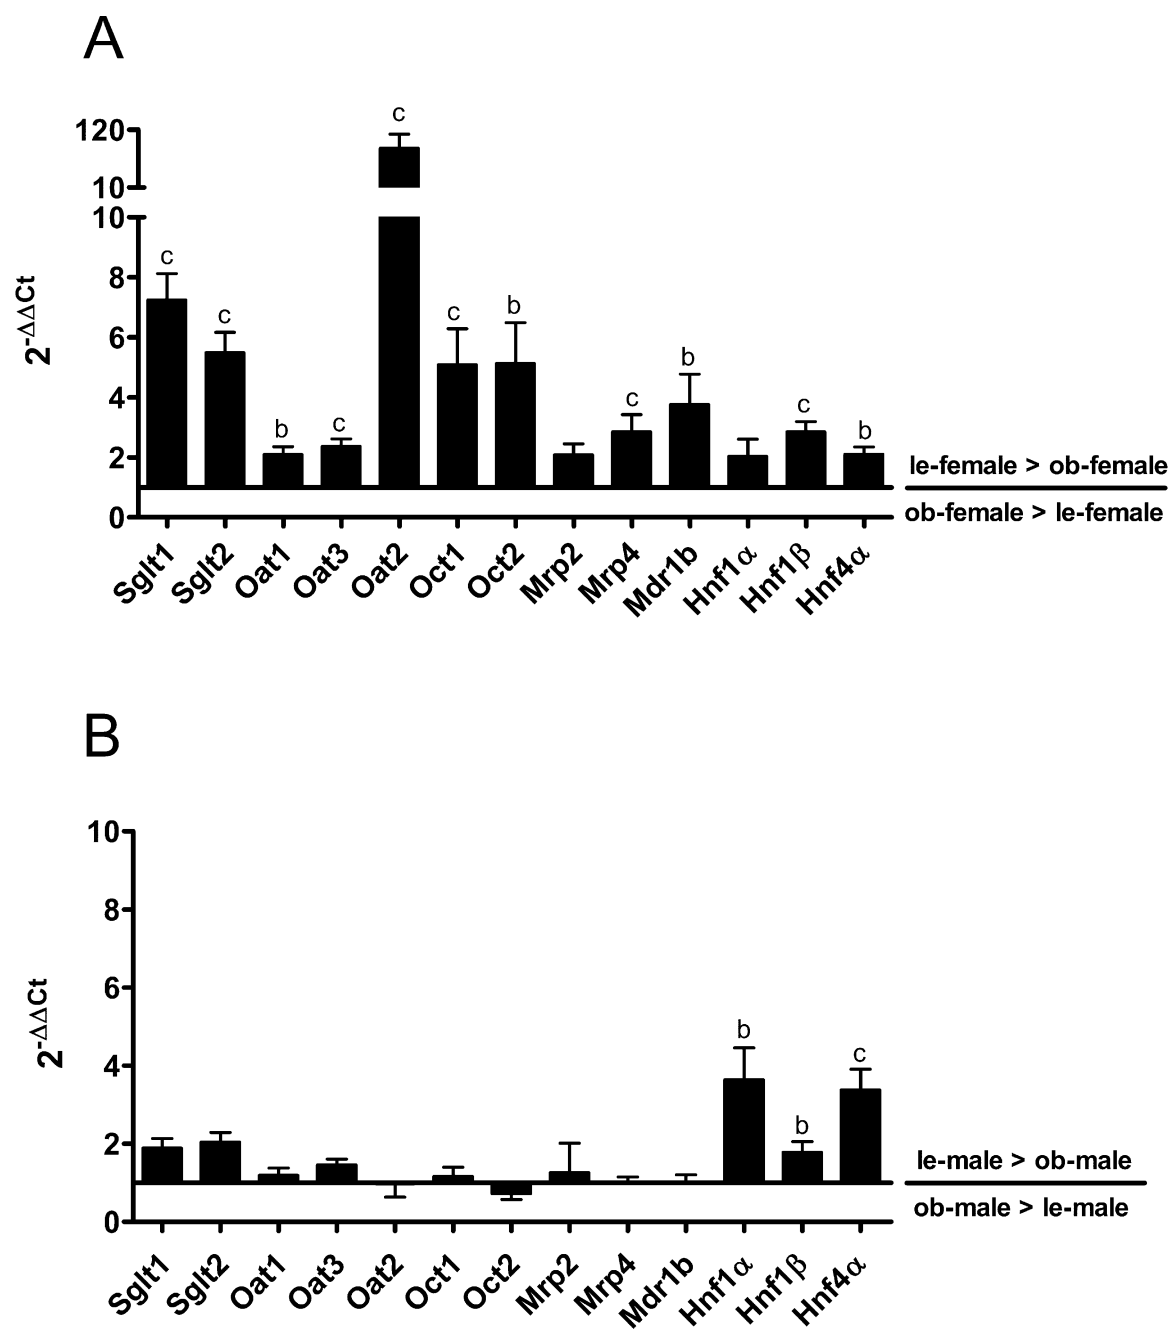

Supplementary figure 2

Supplement: f1 [file 483238.f1.zip]
